# Supplementary material for: TMT-Based Quantitative Proteomic Profiling of Overwintering Lissorhoptrus oryzophilus
Source: Front Physiol. 2020 Jan 21;10:1623. doi: 10.3389/fphys.2019.01623 (PMC6985562; doi:10.3389/fphys.2019.01623)
Supplement: TABLE S2 — Proteins in mainly energy source metabolism network. [file Table_2.xlsx]

## Sheet: Table S2
Table S2 Proteins in mainly energy source metabolism network
NCBI acession No.	Fold change	EC number	Identified Proteins
Krebs cycle
XP_019773471.1	0.90125	1.1.1.37	malate dehydrogenase, mitochondrial
XP_019769958.1	1.04247	1.1.1.37	malate dehydrogenase, cytoplasmic
XP_019767895.1	0.747425	1.1.1.41	probable isocitrate dehydrogenase [NAD] subunit alpha, mitochondrial
XP_019754852.1	0.784584	1.1.1.41	isocitrate dehydrogenase [NAD] subunit gamma, mitochondrial
XP_019767895.1	0.747425	1.1.1.41	probable isocitrate dehydrogenase [NAD] subunit alpha, mitochondrial isoform X1
XP_019757013.1	1.06437	1.1.1.42	isocitrate dehydrogenase [NADP] cytoplasmic
XP_019763488.1	0.63728	1.1.1.42	isocitrate dehydrogenase [NADP]-like
XP_019769387.1	1.34723	1.2.4.1	pyruvate dehydrogenase E1 component subunit beta, mitochondrial
XP_019761447.1	0.790041	1.2.4.2	2-oxoglutarate dehydrogenase, mitochondrial
XP_019771898.1	0.870551	1.3.5.1	succinate dehydrogenase [ubiquinone] iron-sulfur subunit, mitochondrial
XP_019758477.1	0.876606	1.3.5.1	succinate dehydrogenase [ubiquinone] flavoprotein subunit, mitochondrial
XP_019770449.1	0.773782	2.3.1.12	dihydrolipoyllysine-residue acetyltransferase component of pyruvate dehydrogenase complex, mitochondrial
XP_019764220.1	0.806642	2.3.3.1	probable citrate synthase 2, mitochondrial
XP_019765644.1	0.550953	2.3.3.8	ATP-citrate synthase
XP_019754601.1	0.716978	4.1.1.32	phosphoenolpyruvate carboxykinase [GTP]
XP_019773301.1	0.697372	4.2.1.2	fumarate hydratase, mitochondrial
XP_019771461.1	0.795536	4.2.1.3	probable aconitate hydratase, mitochondrial
XP_019766167.1	0.697372	4.2.1.3	cytoplasmic aconitate hydratase
XP_019772705.1	0.673617	6.2.1.4	succinyl-CoA:3-ketoacid coenzyme A transferase 1, mitochondrial
XP_019753787.1	1.3566	6.4.1.1	pyruvate carboxylase, mitochondrial
Fatty acid degradation
XP_019770366.1	1.10957	1.1.1.35	hydroxyacyl-coenzyme A dehydrogenase, mitochondrial
XP_019761101.1	1.47427	1.2.1.3	retinal dehydrogenase 1
XP_019769624.1	0.946058	1.3.8.1	short-chain specific acyl-CoA dehydrogenase, mitochondrial
XP_019761864.1	0.82932	2.3.1.16	trifunctional enzyme subunit beta, mitochondrial
XP_019759184.1	0.784584	2.3.1.9	acetyl-CoA carboxylase isoform X1
XP_019770527.1	0.90125	4.2.1.17	enoyl-CoA hydratase, mitochondrial
XP_019758618.1	1.31951	6.2.1.3	long-chain-fatty-acid--CoA ligase 5
valine, leucine and isoleucine
XP_019770366.1	1.10957	1.1.1.35	hydroxyacyl-coenzyme A dehydrogenase, mitochondrial
XP_019769505.1	0.692555	1.2.1.27	probable methylmalonate-semialdehyde dehydrogenase [acylating], mitochondrial
XP_019761101.1	1.47427	1.2.1.3	retinal dehydrogenase 1
XP_019769624.1	0.946058	1.3.8.1	short-chain specific acyl-CoA dehydrogenase, mitochondrial
XP_019761864.1	0.82932	2.3.1.16	trifunctional enzyme subunit beta, mitochondrial
XP_019770527.1	0.90125	4.2.1.17	enoyl-CoA hydratase, mitochondrial
XP_019767512.1	0.779165	6.4.1.4	probable methylcrotonoyl-CoA carboxylase beta chain, mitochondrial
glycosis/gluconeogenesis
XP_019767162.1	0.959264	1.1.1.1	glyceraldehyde-3-phosphate dehydrogenase 2-like
XP_019770427.1	0.920188	1.2.1.12	glyceraldehyde-3-phosphate dehydrogenase 2 isoform X2
XP_019761101.1	1.47427	1.2.1.3	retinal dehydrogenase 1
XP_019769387.1	1.34723	1.2.4.1	pyruvate dehydrogenase E1 component subunit beta, mitochondrial
XP_019770449.1	0.876606	2.3.1.12	dihydrolipoyllysine-residue acetyltransferase component of pyruvate dehydrogenase complex, mitochondrial
XP_019760187.1	0.790041	2.7.1.1	hexokinase type 2
XP_019755599.1	0.846745	2.7.1.11	ATP-dependent 6-phosphofructokinase
XP_019767800.1	0.812252	2.7.1.40	pyruvate kinase
XP_019769148.1	1.06437	2.7.2.3	phosphoglycerate kinase
XP_019756900.1	0.888843	3.1.3.11	fructose-1,6-bisphosphatase 1
XP_019756900.1	0.888843	4.1.1.32	phosphoenolpyruvate carboxykinase [GTP]
XP_019767728.1	1.03526	4.2.1.11	enolase
XP_019760596.1	0.795536	5.1.3.15	glucose-6-phosphate 1-epimerase
XP_019757104.1	1.00696	5.3.1.1	triosephosphate isomerase
XP_019760531.1	1.17283	5.4.2.11	phosphoglycerate mutase 2
Different color in FC is consistent with Figure 4.
