# Supplementary material for: TMT-Based Quantitative Proteomic Profiling of Overwintering Lissorhoptrus oryzophilus
Source: Front Physiol. 2020 Jan 21;10:1623. doi: 10.3389/fphys.2019.01623 (PMC6985562; doi:10.3389/fphys.2019.01623)
Supplement: TABLE S3 — Interacting upregulated DEPs and their network types based on the GeneMANIA network analysis. [file Table_3.xlsx]

## Sheet: Table S3
Table S3 Interacting upregulated DEPs and their network types based on the GeneMANIA network analysis
Degree Centrality	Gene Symbol	Offical Full Name	Interacting Gene	Networks*
6	Fer1HCH	Ferritin 1 heavy chain homologue	cib	1
			Jheh1	1
			Hsp68	1
			Arr1	1
			Tina-1	1
			Mgstl	2
6	Nrx-IV	Neurexin IV	Cals	1
			fax	1
			Sxl	1
			Nrt	1
			Tak1	1
			cno	2
6	fax	failed axon connections	Cals	1
			Reck	1
			Ubc2	1
			Appl	2
			cib	2
			Mgstl	2
5	Appl	beta amyloid protein precursor-like	Nrt	1
			Arr1	1
			Cals	1
			srpk79D	1
			Sxl	1, 2
4	Peritrophin-A	Peritrophin A	Gld	1
			l(2)efl	1
			Skeletor	1, 3
			y	1
3	Nrt	Neurotactin	Cals	1
			Ubc2	1
			Jheh1	3
2	Arr1	Arrestin 1	y	1
			TpnC4	1
2	Br140	Bromodomain-containing protein, 140kD	Tak1	1
			cib	3
2	cib	ciboulot	Tina-1	1, 3
			Mgstl	3
2	Hsp68	Heat shock protein 68	CHMP2B	1
			Obp56f	1, 2
2	srpk79D	serine-arginine protein kinase at 79D	Nrt	1
			Obp56f	1
2	TpnC4	Troponin C isoform 4	Obp56f	1
			Mgstl	1
1	Gld	Glucose dehydrogenase	Obp56f	1
1	Hsp60B	Heat shock protein 60 related	Hsp68	2
1	Jheh1	Juvenile hormone epoxide hydrolase 1	Reck	1
1	l(2)efl	lethal (2) essential for life	Rpb4	2
1	Obp56f	Odorant-binding protein 56f	Lasp	2
1	Reck	Reversion-inducing-cysteine-rich protein with kazal motifs	Skeletor	1
1	Sxl	Sex lethal	Cals	1
